# Supplementary material
Source: MDPI journal article supplement (https://www.mdpi.com/1424-8247/14/6/518)
Supplement: s1 [file s1]

## SUPPLEMENTARY MATERIALS

### Comparison of solution chemical properties and biological activity of ruthenium complexes of selected $\beta$ -diketone, 8-hydroxyquinoline and pyridithione ligands

Tamás Pivarcsik, Gábor Tóth, Nikolett Szemerédi, Anita Bogdanov, Gabriella Spengler, Jakob Kljun,

Jerneja Kladnik, Iztok Turel, Éva A. Enyedy

**Table S1.** ABCB1 modulating activity on multidrug-resistant Colo 320 colonic adenocarcinoma cells in the presence of complexes **1-8**, RAPTA-C at 2  $\mu$ M and 20  $\mu$ M concentrations. Verapamil (Verap.) was used as a positive control at 20  $\mu$ M. The following fluorescence intensities were determined: forward scatter count (FSC), side scatter count (SSC) and mean fluorescence of the cells (FL-1) at 2  $\mu$ M and 20  $\mu$ M concentrations. FAR: fluorescence accumulation ratio, FAR quotient: FAR of compounds related to that of 20  $\mu$ M verapamil.

| Sample         | Conc.<br>( $\mu$ M) | FCS  | SSC  | FL-1 | FAR  | FAR quotient<br>(%) |
|----------------|---------------------|------|------|------|------|---------------------|
| <b>Verap.</b>  | 20                  | 1973 | 911  | 25.4 | 4.81 | 100                 |
| <b>1</b>       | 2                   | 1949 | 868  | 6.18 | 1.17 | 24.3                |
|                | 20                  | 2068 | 978  | 5.53 | 1.05 | 21.8                |
| <b>2</b>       | 2                   | 2034 | 962  | 5.4  | 1.02 | 21.3                |
|                | 20                  | 2071 | 1024 | 5.41 | 1.02 | 21.3                |
| <b>3</b>       | 2                   | 2054 | 974  | 7.76 | 1.47 | 30.6                |
|                | 20                  | 1989 | 922  | 13.5 | 2.56 | 53.1                |
| <b>4</b>       | 2                   | 2014 | 959  | 4.33 | 0.82 | 17.0                |
|                | 20                  | 1977 | 973  | 8.95 | 1.70 | 35.2                |
| <b>5</b>       | 2                   | 1917 | 840  | 32.7 | 6.19 | 128.7               |
|                | 20                  | 1950 | 877  | 19.3 | 3.66 | 76.0                |
| <b>6</b>       | 2                   | 2003 | 965  | 4.52 | 0.86 | 17.8                |
|                | 20                  | 1912 | 865  | 3.68 | 0.70 | 14.5                |
| <b>7</b>       | 2                   | 1988 | 946  | 5.86 | 1.11 | 23.1                |
|                | 20                  | 1909 | 900  | 6.94 | 1.31 | 27.3                |
| <b>8</b>       | 2                   | 1925 | 877  | 3.51 | 0.66 | 13.8                |
|                | 20                  | 1950 | 917  | 5.68 | 1.08 | 22.4                |
| <b>RAPTA-C</b> | 2                   | 1969 | 967  | 4.02 | 0.76 | 15.8                |
|                | 20                  | 2014 | 995  | 3.87 | 0.73 | 15.2                |
| <b>DMSO</b>    | 2%                  | 1950 | 959  | 2.98 | 0.56 | 11.7                |

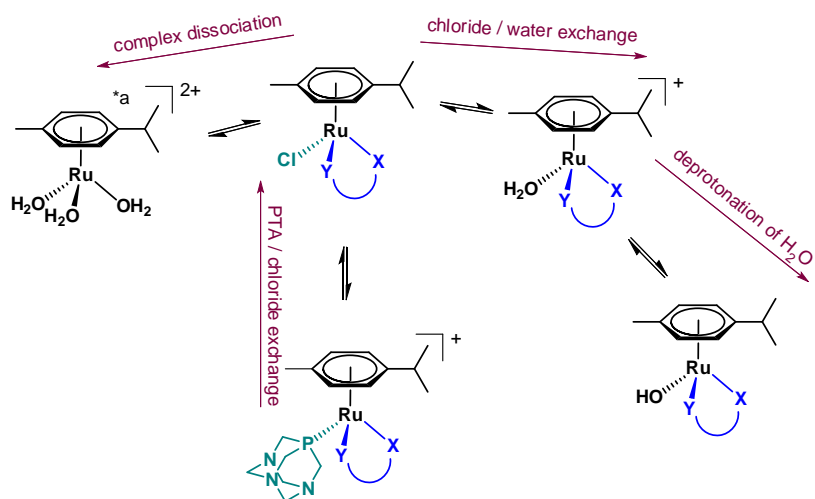

**Scheme S1.** Some selected equilibrium processes taking place in the solution of  $[\text{Ru}(\eta^6\text{-}p\text{-cymene})(\text{X},\text{Y})(\text{Z})]$  complexes, where (X,Y) is a bidentate ligand, Z is the co-ligand  $\text{Cl}^-$  or PTA. <sup>\*a</sup> The actual chemical form of the ligand-free  $[\text{Ru}(\eta^6\text{-}p\text{-cymene})(\text{H}_2\text{O})_3]^{2+}$  depends on the pH and the chloride ion content of the solution [27].

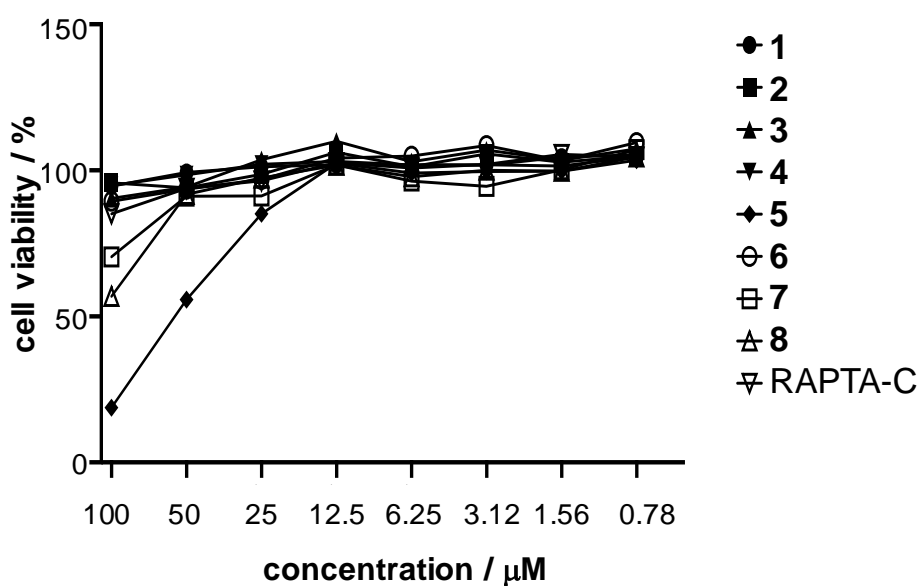

**Figure S1.** Cytotoxicity of the complexes in HeLa cells. {48 h} Complexes **1–4**, **6** and RAPTA-C did not produce significant toxicity.

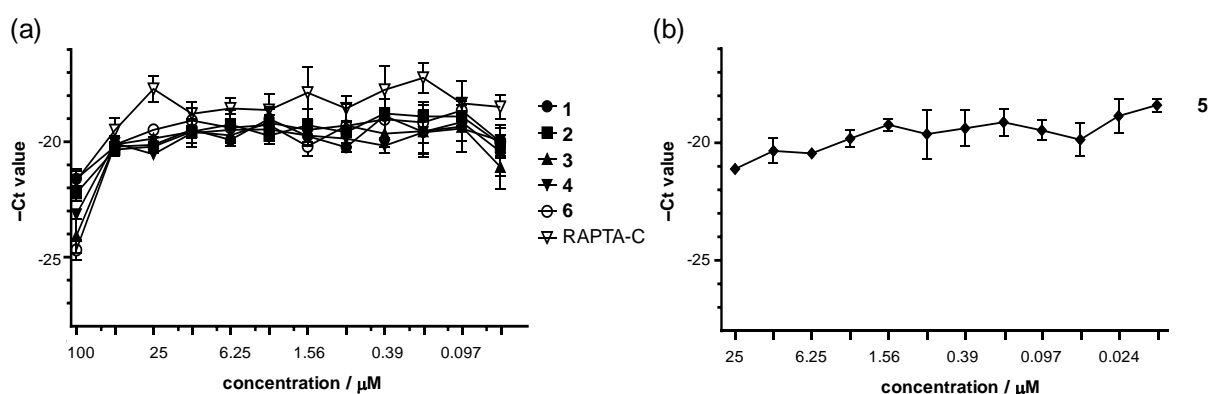

**Figure S2.** Antibacterial effect of complexes (a) 1–4, 6 and RAPTA-C and (b) 5 against *Chlamydia trachomatis*.

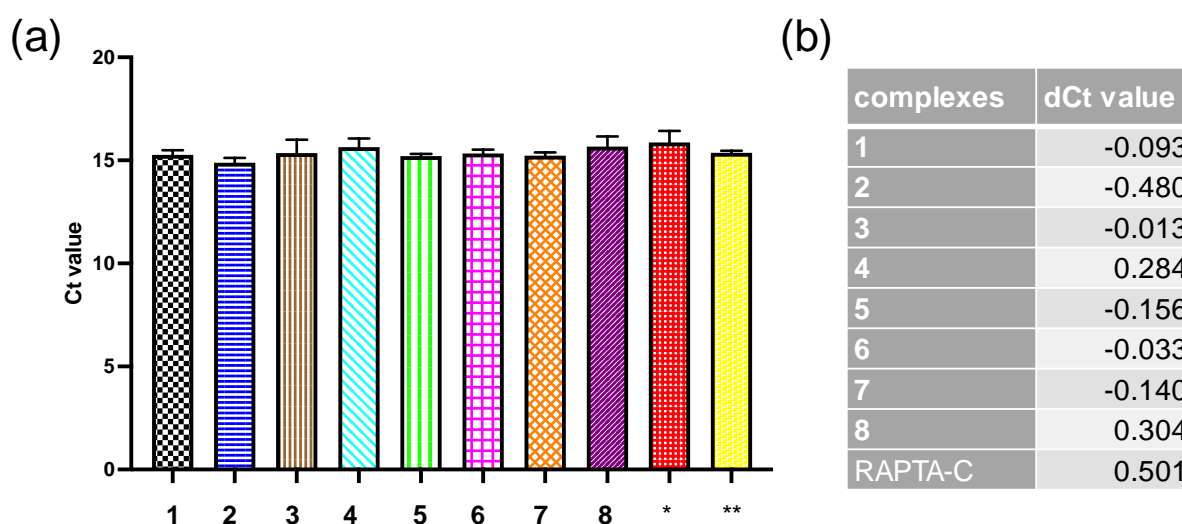

**Figure S3.** (a) Estimation of the direct impact of complexes on the qPCR (\*: RAPTA-C; \*\*: untreated). Cell lysates of HeLa cells infected with untreated *C. trachomatis* (MOI 0.2, 48 h) mixed with cell lysates from uninfected HeLa cells treated with SPG solution contained 200  $\mu\text{M}$  1–4, 6 and RAPTA-C complexes, 100  $\mu\text{M}$  7, 8 complexes and 50  $\mu\text{M}$  complex 5, respectively. Ct values were compared to the mixture of untreated *C. trachomatis* infected cells and uninfected cells. Briefly, an enzyme stimulatory effect would evidence as a false chlamydial growth increasing effect, and the enzyme inhibitory effect during the qPCR would evidence as a false anti-chlamydia activity. If there was no direct impact of complexes on the qPCR, then the Ct level of the 1:1 mixture (basically a two-fold dilution of the chlamydial DNA) of the infected and uninfected but complexes containing cell lysates would have been similar to that of the *C. trachomatis* infected cells and uninfected lysate's. (b) The calculated dCt values of the *C. trachomatis* inhibition/stimulation test. The Ct levels of the *C. trachomatis* + complexes mixtures were under 1 dCt value than the untreated *C. trachomatis* infected cell lysate's.

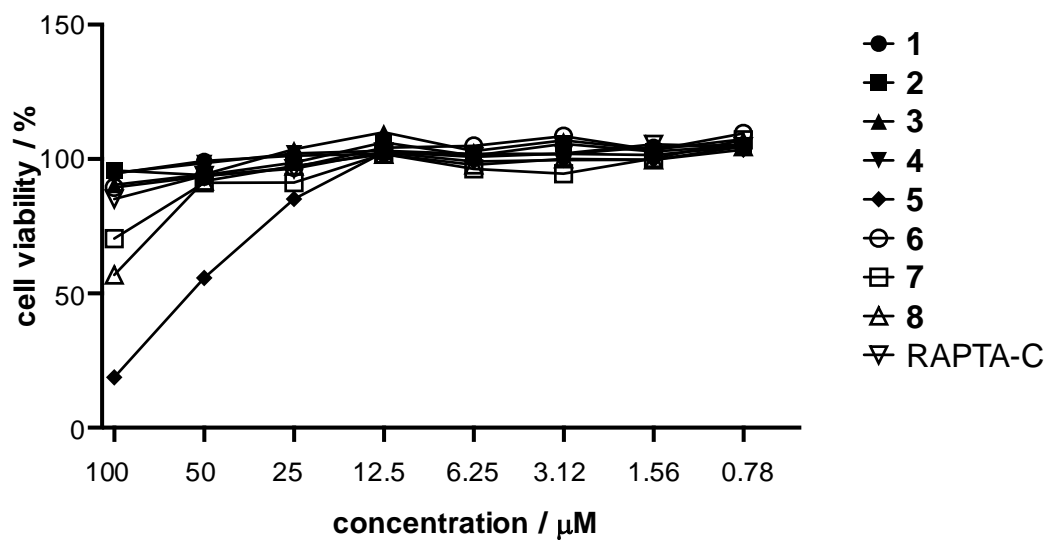

**Figure S4.** Cytotoxicity of the complexes in Vero cells. {24 h} Complexes **1–4**, **7** and **8** did not produce significant toxicity at any of the concentrations.

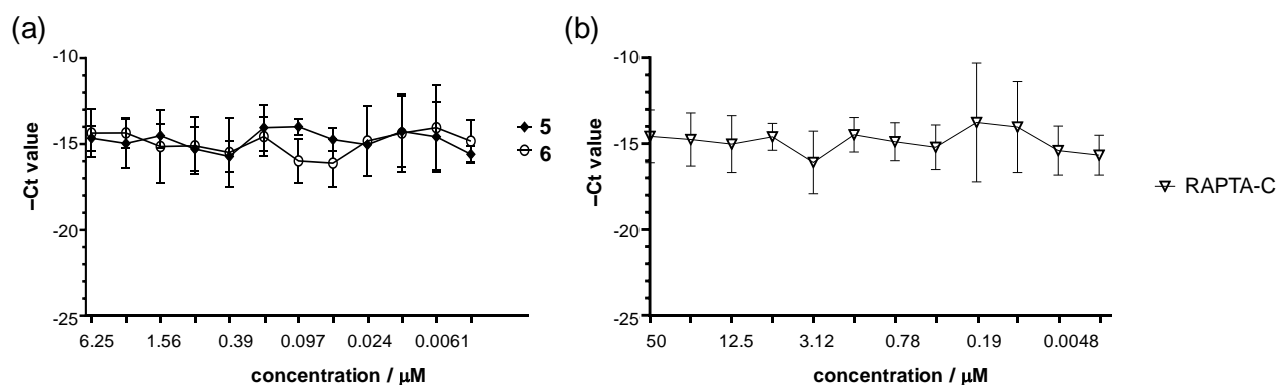

**Figure S5.** Antiviral effect of complexes (a) **5** and **6**, and (b) RAPTA-C against herpes simplex virus-2.

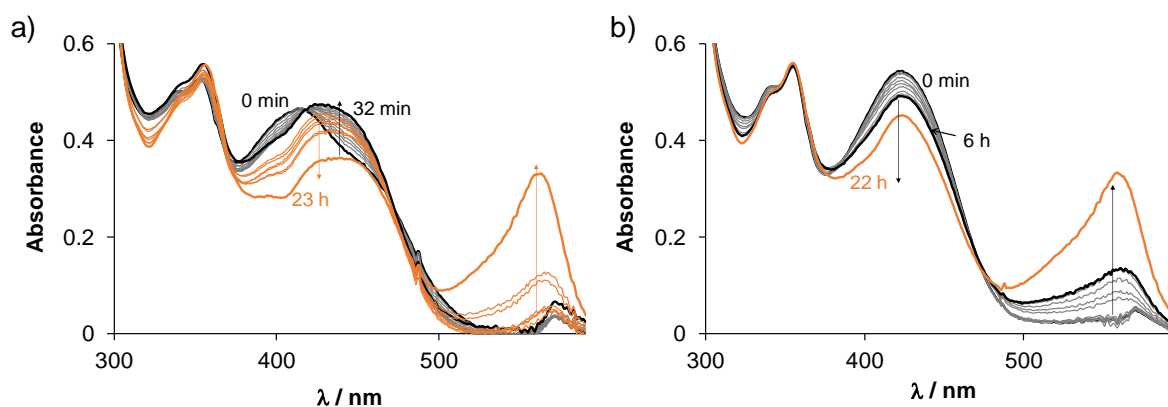

**Figure S6.** Time-dependent UV-vis spectra of (a) **5** and (b) **6** recorded in EMEM. { $T = 25.0\text{ }^{\circ}\text{C}$ ,  $c_{\text{complex}} = 150\text{ }\mu\text{M}$ ; 6% (v/v) DMSO;  $l = 1\text{ cm}$ }

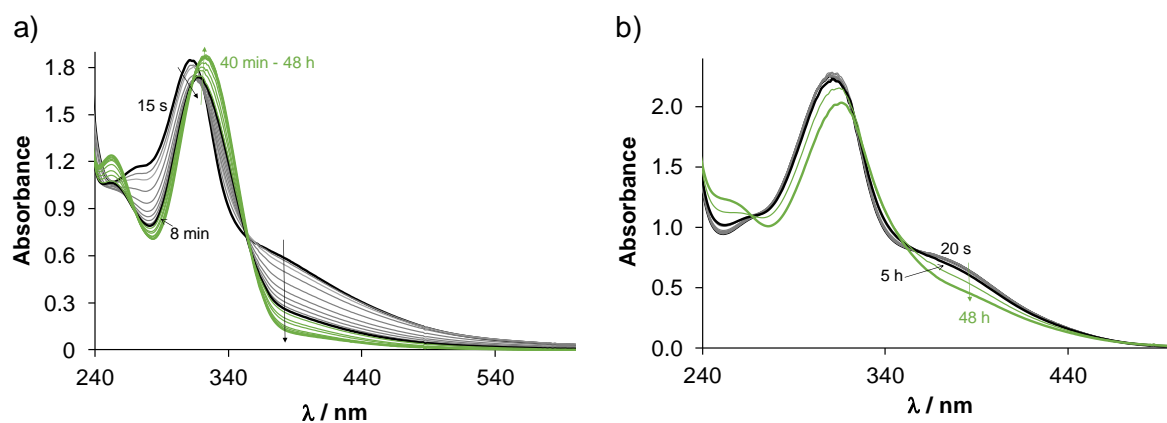

**Figure S7.** Time-dependent UV-vis spectra of (a) **7** and (b) **8** recorded in PBS' at pH 7.4. { $T = 25.0\text{ }^{\circ}\text{C}$ ,  $c_{\text{complex}} = 160\text{ }\mu\text{M}$ ; 2% (v/v) DMSO;  $l = 1\text{ cm}$  (**7**) and  $0.5\text{ cm}$  (**8**)}

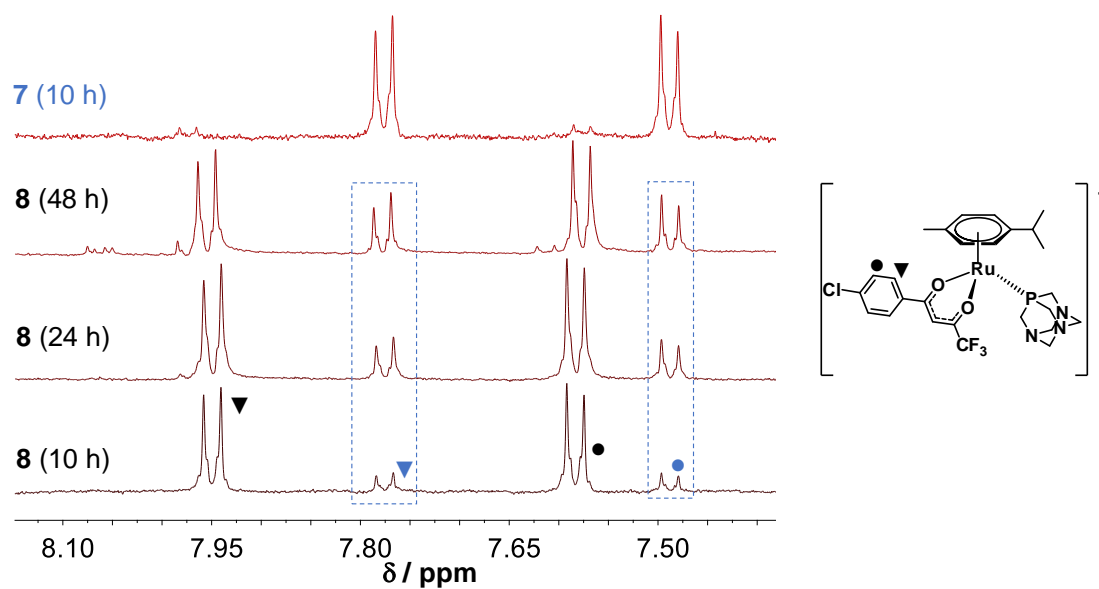

**Figure S8.**  $^1\text{H}$  NMR spectra of **8** at pH 7.4 (PBS') in the low field region recorded after 10, 24 and 48 h waiting time (and spectrum of **7** at 10 h for comparison). The blue frame indicates peaks belonging to formed chlorido complex **7**. { $T = 25.0\text{ }^{\circ}\text{C}$ ,  $c_8 = 0.5\text{ mM}$ ; 10% (v/v) DMSO- $\text{d}_6$ }

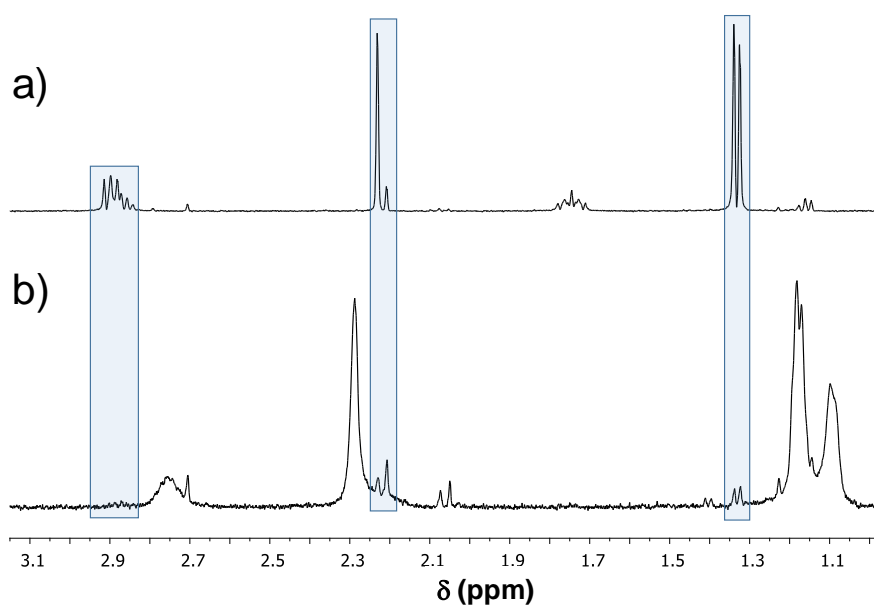

**Figure S9.**  $^1\text{H}$  NMR spectra in the high field region recorded for (a)  $[\text{Ru}(\eta^6\text{-}p\text{-cymene})(\text{H}_2\text{O})_3]^{2+}$  and for (b) complex **1** after 24 h waiting time at pH 1 in the presence of 200 mM chloride ions. Frames peaks denote the unbound  $[\text{Ru}(\eta^6\text{-}p\text{-cymene})(\text{H}_2\text{O})_3]^{2+}$ .  $\{T = 25.0\text{ }^\circ\text{C}, I = 0.2\text{ M KCl}, c_1 = 1\text{ mM}; 10\% \text{ (v/v) D}_2\text{O}\}$

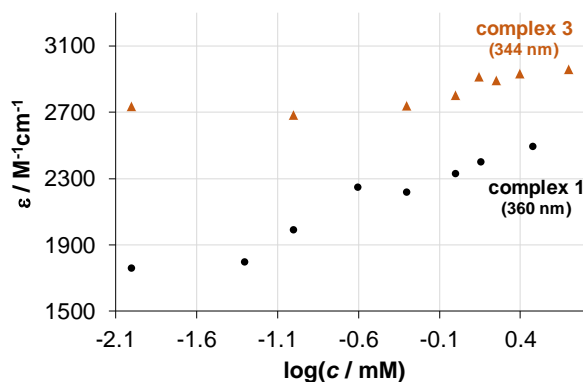

**Figure S10.** Molar absorbance ( $\epsilon$ ) values obtained at various concentrations of complex **1** (at 360 nm) and complex **3** (at 344 nm).  $\{T = 25.0\text{ }^\circ\text{C}, c_{\text{complex}} = 0.01\text{--}3\text{ mM}, \text{path length} = 1\text{--}50\text{ mm}, I = 0.20\text{ M KCl}, \text{pH} = 7.4 \text{ (20 mM phosphate buffer)}\}$

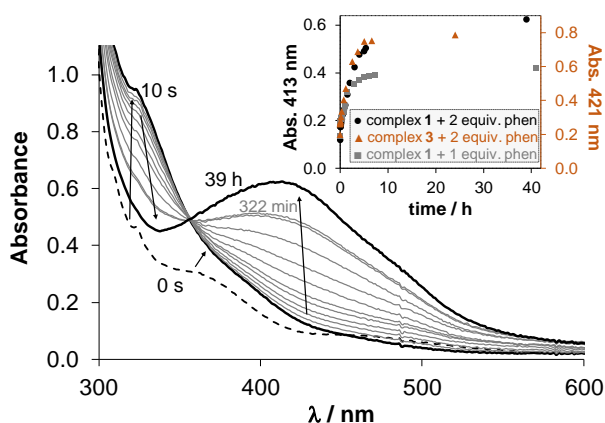

**Figure S11.** Time-dependence of UV-vis absorption spectra recorded for complex **1** in the presence of 2 equivalents of phen at pH = 7.4. Inserted figure shows the absorbance values plotted against the time for complex **1** with 1 equiv. phen (■), 2 equiv. phen (●) at 413 nm and for complex **3** with 2 equiv. phen (▲) at 421 nm. { $T = 25.0\text{ }^{\circ}\text{C}$ ,  $c_{\text{complex}} = 100\text{ }\mu\text{M}$ , pH = 7.40 PBS' buffer}

*Explanation:* The use of a competitor ligand is often an advantage for stability constant determination, thus 1,10-phenantroline (phen) was added to the complexes **1** and **3** for this purpose. However, instead of a simple O,S-ligand/N,N-phen exchange process large and time-dependent spectral changes were observed, which were identified as the replacement of *p*-cymene, similarly as it was reported for Ru( $\eta^6$ -*p*-cymene)–8-hydroxyquinoline complexes [Mészáros, P. J.; Poljarevic, J. M.; Szatmári, I.; Csuvik, O.; Fülöp, F.; Szoboszlai, M.; Spengler, G.; Enyedy, É. A. An 8-hydroxyquinoline-proline hybrid with multidrug resistance reversal activity and solution chemistry of its half-sandwich organometallic Ru and Rh complexes. Dalton Trans. 2020, 49, 7977-7992]. Interestingly, the absorbance–time curves (see the inserted figure) have a biphasic character, which makes it probable that two reactions take place: first the fast formation of a Ru( $\eta^6$ -*p*-cymene)–ligand–phen mixed complex and then in a much slower reaction the *p*-cymene is released leading to the formation of a non-organometallic complex *e.g.* [Ru(ligand)(phen)<sub>2</sub>]<sup>+</sup> at 2 equiv. phen. It should be noted that the detected arene loss is much slower than in case of the 8-hydroxyquinoline complexes. It was also found that addition of the O,S-ligand PYR or HiQT to the chlorido complexes **1** and **3**, respectively, also leads to the loss of the *p*-cymene ring. In contrast, addition of phen to the PTA containing complexes **2** and **4** does not result in arene loss.

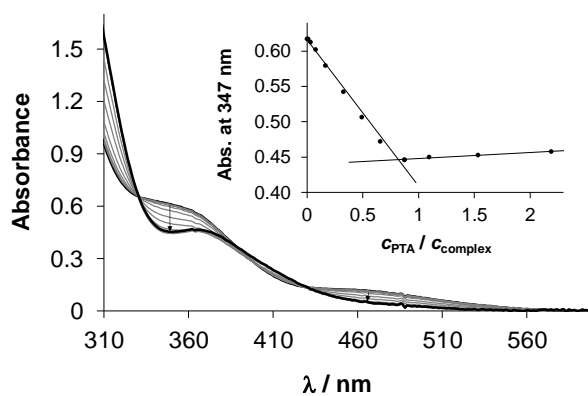

**Figure S12.** UV-vis absorption spectra recorded for complex **1** at various concentrations of PTA at pH = 7.4. Inserted figure shows the absorbance values at 347 nm plotted against the ratio of PTA and the complex. { $T = 25.0\text{ }^{\circ}\text{C}$ ,  $c_{\text{complex } 1} = 193\text{ }\mu\text{M}$ , 2% (v/v) DMSO, 20 mM phosphate buffer;  $l = 1\text{ cm}$ }

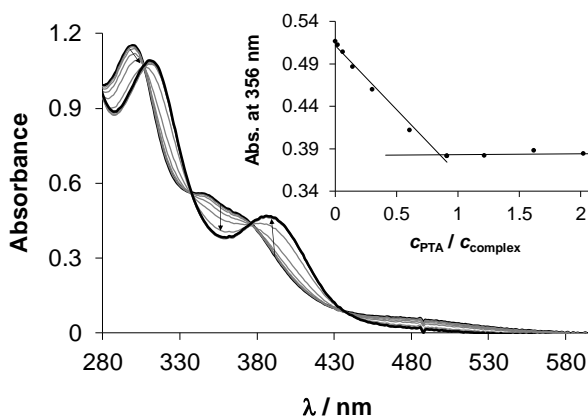

**Figure S13.** UV-vis absorption spectra recorded for complex **3** at various concentrations of PTA at pH = 7.4. Inserted figure shows the absorbance values at 356 nm plotted against the ratio of PTA and the complex. { $T = 25.0\text{ }^{\circ}\text{C}$ ,  $c_{\text{complex } 3} = 104\text{ }\mu\text{M}$ , 2% (v/v) DMSO, 20 mM phosphate buffer;  $l = 1\text{ cm}$ }
